# Supplementary material
Source: publisher site journal article supplement (https://www.dovepress.com/article/539644)
Supplement: Supplementary file 1 [file 539644%20Revised%20Supplementary%20Materials.docx]

**Supplementary materials**

**Table of contents**

[Table S1 Cross-sectional association between CVAI and cardiometabolic diseases 4](#_Toc170684545)

[Table S2 Cross-sectional association between hs-CRP and cardiometabolic diseases 5](#_Toc170684546)

[Table S3 Cross-sectional association between CVAI and cardiometabolic diseases across hs-CRP strata 6](#_Toc170684547)

[Table S4 Details of datasets for longitudinal analyses 8](#_Toc170684548)

[Table S5 Longitudinal association between CVAI and the risk of cardiometabolic diseases 9](#_Toc170684549)

[Table S6 Longitudinal association between hs-CRP and the risk of cardiometabolic diseases 10](#_Toc170684550)

[Table S7 Longitudinal association between CVAI and the risk of cardiometabolic diseases across hs-CRP stratums 11](#_Toc170684551)

[Table S8 Joint effect of CVAI and hs-CRP on the risk of cardiometabolic diseases (sensitivity analysis 1#) 13](#_Toc170684552)

[Table S9 Joint effect of CVAI and hs-CRP on the risk of cardiometabolic diseases (sensitivity analysis 2#) 15](#_Toc170684553)

[Table S10 Joint effect of CVAI and hs-CRP on the risk of cardiometabolic diseases (sensitivity analysis 3#) 17](#_Toc170684554)

[Table S11 Joint effect of CVAI and hs-CRP on the risk of cardiometabolic diseases (sensitivity analysis 4#) 19](#_Toc170684555)

[Table S12 Subgroup analysis for the joint effect of CVAI and hs-CRP on the risk of cardiometabolic diseases by age 21](#_Toc170684556)

[Table S13 Subgroup analysis for the joint effect of CVAI and hs-CRP on the risk of cardiometabolic diseases by sex 22](#_Toc170684557)

[Table S14 Subgroup analysis for the joint effect of CVAI and hs-CRP on the risk of cardiometabolic diseases by BMI stratums 23](#_Toc170684558)

[Table S15 Subgroup analysis for the joint effect of CVAI and hs-CRP on the risk of cardiometabolic diseases by abdominal obesity 24](#_Toc170684559)

[Table S16 Subgroup analysis for the joint effect of CVAI and hs-CRP on the risk of cardiometabolic diseases by smoking status 25](#_Toc170684560)

[Table S17 Subgroup analysis for the joint effect of CVAI and hs-CRP on the risk of cardiometabolic diseases by drinking status 26](#_Toc170684561)

[Table S18 Joint effect of baseline CVAI and follow-up hs-CRP on the risk of cardiometabolic diseases (longitudinal association) 27](#_Toc170684562)

[Table S19 Interactive effects of CVAI and hs-CRP on the risk of cardiometabolic diseases 29](#_Toc170684563)

[Figure S1 Prevalence of chronic diseases across groups 30](#_Toc170684564)

Table S1 Cross-sectional association between CVAI and cardiometabolic diseases

| **Diseases** | **Crude model** | |  | **Model 1** | |  | **Model 2** | |  | **Model 3** | |
| --- | --- | --- | --- | --- | --- | --- | --- | --- | --- | --- | --- |
| **OR (95% CI)** | ***P*-value** |  | **OR (95% CI)** | ***P*-value** |  | **OR (95% CI)** | ***P*-value** |  | **OR (95% CI)** | ***P*-value** |
| **Hypertension** |  |  |  |  |  |  |  |  |  |  |  |
| CVAI <93.32 | Reference |  |  | Reference |  |  | Reference |  |  | Reference |  |
| CVAI ≥93.32 | 2.99 (2.75-3.26) | < 0.001 |  | 2.70 (2.47-2.95) | < 0.001 |  | 1.93 (1.70-2.19) | < 0.001 |  | 1.81 (1.59-2.06) | < 0.001 |
| Each SD increase | 1.99 (1.90-2.08) | < 0.001 |  | 1.87 (1.79-1.97) | < 0.001 |  | 1.58 (1.48-1.69) | < 0.001 |  | 1.52 (1.42-1.63) | < 0.001 |
| **Diabetes** |  |  |  |  |  |  |  |  |  |  |  |
| CVAI <93.32 | Reference |  |  | Reference |  |  | Reference |  |  | Reference |  |
| CVAI ≥93.32 | 2.59 (2.31-2.92) | < 0.001 |  | 2.53 (2.25-2.85) | < 0.001 |  | 2.31 (2.04-2.62) | < 0.001 |  | 2.22 (1.96-2.51) | < 0.001 |
| Each SD increase | 1.73 (1.64-1.83) | < 0.001 |  | 1.72 (1.62-1.82) | < 0.001 |  | 1.63 (1.53-1.73) | < 0.001 |  | 1.59 (1.49-1.69) | < 0.001 |
| **Heart disease** |  |  |  |  |  |  |  |  |  |  |  |
| CVAI <93.32 | Reference |  |  | Reference |  |  | Reference |  |  | Reference |  |
| CVAI ≥93.32 | 1.78 (1.59-2.00) | < 0.001 |  | 1.56 (1.39-1.76) | < 0.001 |  | 1.48 (1.31-1.68) | < 0.001 |  | 1.35 (1.19-1.53) | < 0.001 |
| Each SD increase | 1.44 (1.36-1.53) | < 0.001 |  | 1.36 (1.28-1.44) | < 0.001 |  | 1.34 (1.26-1.43) | < 0.001 |  | 1.27 (1.19-1.35) | < 0.001 |
| **Stroke** |  |  |  |  |  |  |  |  |  |  |  |
| CVAI <93.32 | Reference |  |  | Reference |  |  | Reference |  |  | Reference |  |
| CVAI ≥93.32 | 1.92 (1.51-2.45) | < 0.001 |  | 1.80 (1.40-2.31) | < 0.001 |  | 1.62 (1.25-2.10) | < 0.001 |  | 1.32 (1.01-1.72) | 0.042 |
| Each SD increase | 1.45 (1.30-1.62) | < 0.001 |  | 1.38 (1.24-1.55) | < 0.001 |  | 1.32 (1.17-1.49) | < 0.001 |  | 1.17 (1.03-1.32) | 0.015 |

Results are shown as odds ratios (95% CI) derived from logistic regression models. Model 1 adjusted for age, sex, smoking, drinking, and education. Model 2 further adjusted for SBP, FPG (except for diabetes analyses), TC, LDL-C, Scr and UA. Model 3 was adjusted for the variables in model 2 plus cardiometabolic diseases (for the other diseases analyses), including hypertension, diabetes, heart disease and stroke.

Table S2 Cross-sectional association between hs-CRP and cardiometabolic diseases

| **Diseases** | **Crude model** | |  | **Model 1** | |  | **Model 2** | |  | **Model 3** | |
| --- | --- | --- | --- | --- | --- | --- | --- | --- | --- | --- | --- |
| **OR (95% CI)** | ***P*-value** |  | **OR (95% CI)** | ***P*-value** |  | **OR (95% CI)** | ***P*-value** |  | **OR (95% CI)** | ***P*-value** |
| **Hypertension** |  |  |  |  |  |  |  |  |  |  |  |
| hs-CRP <1 | Reference |  |  | Reference |  |  | Reference |  |  | Reference |  |
| hs-CRP ≥1 | 1.71 (1.57-1.85) | < 0.001 |  | 1.58 (1.46-1.72) | < 0.001 |  | 1.32 (1.17-1.50) | < 0.001 |  | 1.29 (1.14-1.46) | < 0.001 |
| Each SD increase | 1.12 (1.08-1.18) | < 0.001 |  | 1.08 (1.04-1.13) | < 0.001 |  | 1.08 (1.02-1.15) | 0.012 |  | 1.09 (1.02-1.15) | 0.009 |
| **Diabetes** |  |  |  |  |  |  |  |  |  |  |  |
| hs-CRP <1 | Reference |  |  | Reference |  |  | Reference |  |  | Reference |  |
| hs-CRP ≥1 | 1.69 (1.51-1.89) | < 0.001 |  | 1.64 (1.47-1.84) | < 0.001 |  | 1.58 (1.41-1.78) | < 0.001 |  | 1.55 (1.38-1.74) | < 0.001 |
| Each SD increase | 1.12 (1.07-1.17) | < 0.001 |  | 1.11 (1.06-1.16) | < 0.001 |  | 1.12 (1.07-1.17) | < 0.001 |  | 1.11 (1.06-1.17) | < 0.001 |
| **Heart disease** |  |  |  |  |  |  |  |  |  |  |  |
| hs-CRP <1 | Reference |  |  | Reference |  |  | Reference |  |  | Reference |  |
| hs-CRP ≥1 | 1.27 (1.13-1.42) | < 0.001 |  | 1.18 (1.05-1.32) | 0.006 |  | 1.12 (1.00-1.27) | 0.055 |  | 1.07 (0.95-1.21) | 0.252 |
| Each SD increase | 1.04 (0.99-1.10) | 0.110 |  | 1.03 (0.97-1.08) | 0.358 |  | 1.01 (0.96-1.07) | 0.616 |  | 1.01 (0.95-1.06) | 0.867 |
| **Stroke** |  |  |  |  |  |  |  |  |  |  |  |
| hs-CRP <1 | Reference |  |  | Reference |  |  | Reference |  |  | Reference |  |
| hs-CRP ≥1 | 1.60 (1.26-2.03) | < 0.001 |  | 1.48 (1.16-1.88) | 0.002 |  | 1.35 (1.06-1.73) | 0.017 |  | 1.25 (0.97-1.60) | 0.079 |
| Each SD increase | 1.05 (0.96-1.15) | 0.300 |  | 1.02 (0.92-1.13) | 0.697 |  | 1.00 (0.90-1.11) | 0.945 |  | 0.99 (0.89-1.10) | 0.838 |

Results are shown as odds ratios (95% CI) derived from logistic regression models. Model 1 adjusted for age, sex, smoking, drinking, and education. Model 2 further adjusted for SBP, FPG (except for diabetes analyses), TC, LDL-C, Scr and UA. Model 3 was adjusted for the variables in model 2 plus cardiometabolic diseases (for the other diseases analyses), including hypertension, diabetes, heart disease and stroke.

Table S3 Cross-sectional association between CVAI and cardiometabolic diseases across hs-CRP strata

| **Diseases** | **Crude model** | |  | **Model 1** | |  | **Model 2** | |  | **Model 3** | |
| --- | --- | --- | --- | --- | --- | --- | --- | --- | --- | --- | --- |
| **OR (95% CI)** | ***P*-value** |  | **OR (95% CI)** | ***P*-value** |  | **OR (95% CI)** | ***P*-value** |  | **OR (95% CI)** | ***P*-value** |
| **hs-CRP <1** |  |  |  |  |  |  |  |  |  |  |  |
| **Hypertension** |  |  |  |  |  |  |  |  |  |  |  |
| CVAI <93.32 | Reference |  |  | Reference |  |  | Reference |  |  | Reference |  |
| CVAI ≥93.32 | 2.50 (2.21-2.83) | < 0.001 |  | 2.20 (1.93-2.50) | < 0.001 |  | 1.68 (1.39-2.03) | < 0.001 |  | 1.61 (1.33-1.95) | < 0.001 |
| Each SD increase | 1.85 (1.72-1.99) | < 0.001 |  | 1.71 (1.58-1.84) | < 0.001 |  | 1.49 (1.34-1.66) | < 0.001 |  | 1.45 (1.30-1.62) | < 0.001 |
| **Diabetes** |  |  |  |  |  |  |  |  |  |  |  |
| CVAI <93.32 | Reference |  |  | Reference |  |  | Reference |  |  | Reference |  |
| CVAI ≥93.32 | 2.37 (1.99-2.83) | < 0.001 |  | 2.28 (1.91-2.73) | < 0.001 |  | 2.16 (1.80-2.60) | < 0.001 |  | 2.13 (1.77-2.56) | < 0.001 |
| Each SD increase | 1.70 (1.55-1.87) | < 0.001 |  | 1.67 (1.52-1.84) | < 0.001 |  | 1.60 (1.45-1.77) | < 0.001 |  | 1.59 (1.44-1.76) | < 0.001 |
| **Heart disease** |  |  |  |  |  |  |  |  |  |  |  |
| CVAI <93.32 | Reference |  |  | Reference |  |  | Reference |  |  | Reference |  |
| CVAI ≥93.32 | 1.62 (1.37-1.93) | < 0.001 |  | 1.42 (1.19-1.69) | < 0.001 |  | 1.37 (1.14-1.64) | 0.001 |  | 1.28 (1.07-1.55) | 0.008 |
| Each SD increase | 1.42 (1.30-1.56) | < 0.001 |  | 1.32 (1.20-1.46) | < 0.001 |  | 1.30 (1.18-1.44) | < 0.001 |  | 1.25 (1.12-1.38) | < 0.001 |
| **Stroke** |  |  |  |  |  |  |  |  |  |  |  |
| CVAI <93.32 | Reference |  |  | Reference |  |  | Reference |  |  | Reference |  |
| CVAI ≥93.32 | 1.67 (1.15-2.43) | 0.008 |  | 1.46 (0.99-2.15) | 0.055 |  | 1.38 (0.93-2.06) | 0.109 |  | 1.19 (0.79-1.78) | 0.404 |
| Each SD increase | 1.26 (1.03-1.55) | 0.022 |  | 1.15 (0.94-1.42) | 0.183 |  | 1.11 (0.90-1.37) | 0.345 |  | 0.99 (0.80-1.24) | 0.958 |
| **hs-CRP ≥1** |  |  |  |  |  |  |  |  |  |  |  |
| **Hypertension** |  |  |  |  |  |  |  |  |  |  |  |
| CVAI <93.32 | Reference |  |  | Reference |  |  | Reference |  |  | Reference |  |
| CVAI ≥93.32 | 3.11 (2.76-3.52) | < 0.001 |  | 2.92 (2.57-3.31) | < 0.001 |  | 2.06 (1.72-2.46) | < 0.001 |  | 1.92 (1.60-2.30) | < 0.001 |
| Each SD increase | 1.99 (1.87-2.12) | < 0.001 |  | 1.91 (1.79-2.04) | < 0.001 |  | 1.63 (1.49-1.78) | < 0.001 |  | 1.56 (1.42-1.71) | < 0.001 |
| **Diabetes** |  |  |  |  |  |  |  |  |  |  |  |
| CVAI <93.32 | Reference |  |  | Reference |  |  | Reference |  |  | Reference |  |
| CVAI ≥93.32 | 2.44 (2.07-2.87) | < 0.001 |  | 2.41 (2.04-2.85) | < 0.001 |  | 2.17 (1.82-2.59) | < 0.001 |  | 2.04 (1.71-2.43) | < 0.001 |
| Each SD increase | 1.66 (1.55-1.79) | < 0.001 |  | 1.66 (1.54-1.78) | < 0.001 |  | 1.56 (1.44-1.69) | < 0.001 |  | 1.50 (1.39-1.63) | < 0.001 |
| **Heart disease** |  |  |  |  |  |  |  |  |  |  |  |
| CVAI <93.32 | Reference |  |  | Reference |  |  | Reference |  |  | Reference |  |
| CVAI ≥93.32 | 1.86 (1.57-2.20) | < 0.001 |  | 1.67 (1.40-1.99) | < 0.001 |  | 1.58 (1.32-1.89) | < 0.001 |  | 1.41 (1.17-1.70) | < 0.001 |
| Each SD increase | 1.44 (1.34-1.55) | < 0.001 |  | 1.38 (1.28-1.49) | < 0.001 |  | 1.36 (1.25-1.48) | < 0.001 |  | 1.28 (1.17-1.39) | < 0.001 |
| **Stroke** |  |  |  |  |  |  |  |  |  |  |  |
| CVAI <93.32 | Reference |  |  | Reference |  |  | Reference |  |  | Reference |  |
| CVAI ≥93.32 | 1.87 (1.34-2.62) | < 0.001 |  | 1.88 (1.33-2.65) | < 0.001 |  | 1.72 (1.20-2.47) | 0.003 |  | 1.37 (0.95-1.97) | 0.095 |
| Each SD increase | 1.47 (1.28-1.69) | < 0.001 |  | 1.45 (1.25-1.67) | < 0.001 |  | 1.41 (1.21-1.65) | < 0.001 |  | 1.25 (1.07-1.46) | < 0.001 |

Results are shown as odds ratios (95% CI) derived from logistic regression models. Model 1 adjusted for age, sex, smoking, drinking, and education. Model 2 further adjusted for SBP, FPG (except for diabetes analyses), TC, LDL-C, Scr and UA. Model 3 was adjusted for the variables in model 2 plus cardiometabolic diseases (for the other diseases analyses), including hypertension, diabetes, heart disease and stroke.

Table S4 Details of datasets for longitudinal analyses

| **Datasets for analysis** | **Sample size**  **(N)** | **Events**  **(N)** | **Incidence**  **(%)** | **Follow-up period**  **(person-years)** | **Incidence**  **(per 1000 person-years)** |
| --- | --- | --- | --- | --- | --- |
| **Hypertension risk** | 5,520 | 1,420 | 25.7 | 42,276 | 245.3 |
| **Diabetes risk** | 7,794 | 867 | 11.1 | 62,485 | 95.9 |
| **Heart diseases risk** | 7,923 | 1,313 | 16.6 | 62,660 | 152.2 |
| **Stroke risk** | 8,993 | 777 | 8.6 | 72,975 | 79.5 |

Table S5 Longitudinal association between CVAI and the risk of cardiometabolic diseases

| **Diseases** | **Crude model** | |  | **Model 1** | |  | **Model 2** | |  | **Model 3** | |
| --- | --- | --- | --- | --- | --- | --- | --- | --- | --- | --- | --- |
| **HR (95% CI)** | ***P*-value** |  | **HR (95% CI)** | ***P*-value** |  | **HR (95% CI)** | ***P*-value** |  | **HR (95% CI)** | ***P*-value** |
| **Hypertension** |  |  |  |  |  |  |  |  |  |  |  |
| CVAI <93.32 | Reference |  |  | Reference |  |  | Reference |  |  | Reference |  |
| CVAI ≥93.32 | 1.82 (1.64-2.02) | < 0.001 |  | 1.76 (1.58-1.95) | < 0.001 |  | 1.44 (1.29-1.60) | < 0.001 |  | 1.41 (1.26-1.58) | < 0.001 |
| Each SD increase | 1.43 (1.36-1.51) | < 0.001 |  | 1.41 (1.33-1.49) | < 0.001 |  | 1.26 (1.19-1.34) | < 0.001 |  | 1.25 (1.17-1.32) | < 0.001 |
| **Diabetes** |  |  |  |  |  |  |  |  |  |  |  |
| CVAI <93.32 | Reference |  |  | Reference |  |  | Reference |  |  | Reference |  |
| CVAI ≥93.32 | 2.30 (2.00-2.65) | < 0.001 |  | 2.28 (1.98-2.63) | < 0.001 |  | 1.92 (1.65-2.22) | < 0.001 |  | 1.83 (1.57-2.12) | < 0.001 |
| Each SD increase | 1.56 (1.47-1.67) | < 0.001 |  | 1.57 (1.47-1.68) | < 0.001 |  | 1.44 (1.34-1.54) | < 0.001 |  | 1.39 (1.29-1.49) | < 0.001 |
| **Heart disease** |  |  |  |  |  |  |  |  |  |  |  |
| CVAI <93.32 | Reference |  |  | Reference |  |  | Reference |  |  | Reference |  |
| CVAI ≥93.32 | 1.57 (1.41-1.76) | < 0.001 |  | 1.43 (1.28-1.60) | < 0.001 |  | 1.36 (1.21-1.54) | < 0.001 |  | 1.33 (1.18-1.50) | < 0.001 |
| Each SD increase | 1.30 (1.23-1.37) | < 0.001 |  | 1.24 (1.17-1.31) | < 0.001 |  | 1.22 (1.15-1.30) | < 0.001 |  | 1.20 (1.13-1.27) | < 0.001 |
| **Stroke** |  |  |  |  |  |  |  |  |  |  |  |
| CVAI <93.32 | Reference |  |  | Reference |  |  | Reference |  |  | Reference |  |
| CVAI ≥93.32 | 2.03 (1.75-2.35) | < 0.001 |  | 1.89 (1.63-2.20) | < 0.001 |  | 1.62 (1.39-1.90) | < 0.001 |  | 1.53 (1.31-1.79) | < 0.001 |
| Each SD increase | 1.49 (1.39-1.59) | < 0.001 |  | 1.42 (1.32-1.52) | < 0.001 |  | 1.31 (1.22-1.41) | < 0.001 |  | 1.26 (1.17-1.36) | < 0.001 |

Results are shown as hazard ratios (95% CI) derived from Cox regression models. Model 1 adjusted for age, sex, smoking, drinking, and education. Model 2 further adjusted for SBP, FPG, TC, LDL-C, Scr and UA. Model 3 was adjusted for the variables in model 2 plus history of cardiometabolic diseases (for the other diseases analyses), including hypertension, diabetes, heart disease and stroke.

Table S6 Longitudinal association between hs-CRP and the risk of cardiometabolic diseases

| **Diseases** | **Crude model** | |  | **Model 1** | |  | **Model 2** | |  | **Model 3** | |
| --- | --- | --- | --- | --- | --- | --- | --- | --- | --- | --- | --- |
| **HR (95% CI)** | ***P*-value** |  | **HR (95% CI)** | ***P*-value** |  | **HR (95% CI)** | ***P*-value** |  | **HR (95% CI)** | ***P*-value** |
| **Hypertension** |  |  |  |  |  |  |  |  |  |  |  |
| hs-CRP <1 | Reference |  |  | Reference |  |  | Reference |  |  | Reference |  |
| hs-CRP ≥1 | 1.22 (1.10-1.35) | < 0.001 |  | 1.19 (1.07-1.32) | 0.001 |  | 1.07 (0.97-1.19) | 0.194 |  | 1.07 (0.96-1.19) | 0.237 |
| Each SD increase | 1.03 (0.98-1.08) | 0.229 |  | 1.03 (0.98-1.08) | 0.333 |  | 1.02 (0.96-1.08) | 0.518 |  | 1.02 (0.97-1.08) | 0.487 |
| **Diabetes** |  |  |  |  |  |  |  |  |  |  |  |
| hs-CRP <1 | Reference |  |  | Reference |  |  | Reference |  |  | Reference |  |
| hs-CRP ≥1 | 1.44 (1.26-1.65) | < 0.001 |  | 1.43 (1.25-1.64) | < 0.001 |  | 1.29 (1.13-1.48) | < 0.001 |  | 1.26 (1.10-1.45) | 0.001 |
| Each SD increase | 1.08 (1.03-1.14) | 0.001 |  | 1.09 (1.04-1.14) | 0.001 |  | 1.07 (1.01-1.12) | 0.013 |  | 1.07 (1.01-1.12) | 0.014 |
| **Heart disease** |  |  |  |  |  |  |  |  |  |  |  |
| hs-CRP <1 | Reference |  |  | Reference |  |  | Reference |  |  | Reference |  |
| hs-CRP ≥1 | 1.24 (1.12-1.39) | < 0.001 |  | 1.19 (1.06-1.32) | 0.002 |  | 1.15 (1.03-1.29) | 0.012 |  | 1.14 (1.02-1.27) | 0.026 |
| Each SD increase | 1.03 (0.97-1.08) | 0.357 |  | 1.02 (0.96-1.08) | 0.570 |  | 1.01 (0.95-1.07) | 0.812 |  | 1.00 (0.95-1.07) | 0.884 |
| **Stroke** |  |  |  |  |  |  |  |  |  |  |  |
| hs-CRP <1 | Reference |  |  | Reference |  |  | Reference |  |  | Reference |  |
| hs-CRP ≥1 | 1.73 (1.50-2.01) | < 0.001 |  | 1.64 (1.41-1.89) | < 0.001 |  | 1.50 (1.30-1.75) | < 0.001 |  | 1.47 (1.27-1.71) | < 0.001 |
| Each SD increase | 1.09 (1.04-1.15) | < 0.001 |  | 1.08 (1.03-1.13) | 0.004 |  | 1.07 (1.01-1.13) | 0.017 |  | 1.07 (1.01-1.13) | 0.021 |

Results are shown as hazard ratios (95% CI) derived from Cox regression models. Model 1 adjusted for age, sex, smoking, drinking, and education. Model 2 further adjusted for SBP, FPG, TC, LDL-C, Scr and UA. Model 3 was adjusted for the variables in model 2 plus history of cardiometabolic diseases (for the other diseases analyses), including hypertension, diabetes, heart disease and stroke.

Table S7 Longitudinal association between CVAI and the risk of cardiometabolic diseases across hs-CRP stratums

| **Diseases** | **Crude model** | |  | **Model 1** | |  | **Model 2** | |  | **Model 3** | |
| --- | --- | --- | --- | --- | --- | --- | --- | --- | --- | --- | --- |
| **HR (95% CI)** | ***P*-value** |  | **HR (95% CI)** | ***P*-value** |  | **HR (95% CI)** | ***P*-value** |  | **HR (95% CI)** | ***P*-value** |
| **hs-CRP <1** |  |  |  |  |  |  |  |  |  |  |  |
| **Hypertension** |  |  |  |  |  |  |  |  |  |  |  |
| CVAI <93.32 | Reference |  |  | Reference |  |  | Reference |  |  | Reference |  |
| CVAI ≥93.32 | 1.65 (1.42-1.92) | < 0.001 |  | 1.57 (1.35-1.83) | < 0.001 |  | 1.29 (1.11-1.51) | 0.001 |  | 1.28 (1.10-1.50) | 0.002 |
| Each SD increase | 1.42 (1.30-1.54) | < 0.001 |  | 1.38 (1.27-1.51) | < 0.001 |  | 1.24 (1.14-1.36) | < 0.001 |  | 1.23 (1.12-1.35) | < 0.001 |
| **Diabetes** |  |  |  |  |  |  |  |  |  |  |  |
| CVAI <93.32 | Reference |  |  | Reference |  |  | Reference |  |  | Reference |  |
| CVAI ≥93.32 | 2.05 (1.68-2.52) | < 0.001 |  | 1.97 (1.60-2.42) | < 0.001 |  | 1.73 (1.40-2.14) | < 0.001 |  | 1.67 (1.35-2.07) | < 0.001 |
| Each SD increase | 1.47 (1.32-1.64) | < 0.001 |  | 1.44 (1.28-1.61) | < 0.001 |  | 1.33 (1.18-1.50) | < 0.001 |  | 1.30 (1.15-1.46) | < 0.001 |
| **Heart disease** |  |  |  |  |  |  |  |  |  |  |  |
| CVAI <93.32 | Reference |  |  | Reference |  |  | Reference |  |  | Reference |  |
| CVAI ≥93.32 | 1.48 (1.26-1.74) | < 0.001 |  | 1.31 (1.11-1.55) | 0.001 |  | 1.26 (1.06-1.49) | 0.007 |  | 1.25 (1.05-1.48) | 0.011 |
| Each SD increase | 1.28 (1.17-1.40) | < 0.001 |  | 1.19 (1.09-1.31) | < 0.001 |  | 1.16 (1.06-1.28) | 0.002 |  | 1.15 (1.05-1.27) | 0.004 |
| **Stroke** |  |  |  |  |  |  |  |  |  |  |  |
| CVAI <93.32 | Reference |  |  | Reference |  |  | Reference |  |  | Reference |  |
| CVAI ≥93.32 | 1.96 (1.56-2.47) | < 0.001 |  | 1.81 (1.43-2.29) | < 0.001 |  | 1.63 (1.28-2.08) | < 0.001 |  | 1.55 (1.21-1.97) | < 0.001 |
| Each SD increase | 1.51 (1.34-1.70) | < 0.001 |  | 1.44 (1.27-1.63) | < 0.001 |  | 1.35 (1.19-1.54) | < 0.001 |  | 1.30 (1.14-1.48) | < 0.001 |
| **hs-CRP ≥1** |  |  |  |  |  |  |  |  |  |  |  |
| **Hypertension** |  |  |  |  |  |  |  |  |  |  |  |
| CVAI <93.32 | Reference |  |  | Reference |  |  | Reference |  |  | Reference |  |
| CVAI ≥93.32 | 1.94 (1.66-2.26) | < 0.001 |  | 1.92 (1.64-2.25) | < 0.001 |  | 1.59 (1.35-1.87) | < 0.001 |  | 1.56 (1.32-1.84) | < 0.001 |
| Each SD increase | 1.43 (1.32-1.54) | < 0.001 |  | 1.41 (1.31-1.52) | < 0.001 |  | 1.27 (1.17-1.38) | < 0.001 |  | 1.26 (1.16-1.37) | < 0.001 |
| **Diabetes** |  |  |  |  |  |  |  |  |  |  |  |
| CVAI <93.32 | Reference |  |  | Reference |  |  | Reference |  |  | Reference |  |
| CVAI ≥93.32 | 2.37 (1.93-2.91) | < 0.001 |  | 2.37 (1.92-2.92) | < 0.001 |  | 1.97 (1.59-2.45) | < 0.001 |  | 1.87 (1.51-2.33) | < 0.001 |
| Each SD increase | 1.57 (1.44-1.72) | < 0.001 |  | 1.61 (1.47-1.76) | < 0.001 |  | 1.47 (1.34-1.62) | < 0.001 |  | 1.42 (1.29-1.57) | < 0.001 |
| **Heart disease** |  |  |  |  |  |  |  |  |  |  |  |
| CVAI <93.32 | Reference |  |  | Reference |  |  | Reference |  |  | Reference |  |
| CVAI ≥93.32 | 1.59 (1.35-1.86) | < 0.001 |  | 1.46 (1.24-1.72) | < 0.001 |  | 1.39 (1.18-1.65) | < 0.001 |  | 1.34 (1.13-1.60) | 0.001 |
| Each SD increase | 1.28 (1.19-1.38) | < 0.001 |  | 1.24 (1.15-1.34) | < 0.001 |  | 1.23 (1.14-1.34) | < 0.001 |  | 1.21 (1.11-1.31) | < 0.001 |
| **Stroke** |  |  |  |  |  |  |  |  |  |  |  |
| CVAI <93.32 | Reference |  |  | Reference |  |  | Reference |  |  | Reference |  |
| CVAI ≥93.32 | 1.76 (1.44-2.15) | < 0.001 |  | 1.69 (1.38-2.08) | < 0.001 |  | 1.44 (1.16-1.78) | 0.001 |  | 1.35 (1.09-1.68) | 0.006 |
| Each SD increase | 1.38 (1.26-1.50) | < 0.001 |  | 1.33 (1.22-1.45) | < 0.001 |  | 1.23 (1.12-1.35) | < 0.001 |  | 1.18 (1.08-1.30) | 0.001 |

Results are shown as hazard ratios (95% CI) derived from Cox regression models. Model 1 adjusted for age, sex, smoking, drinking, and education. Model 2 further adjusted for SBP, FPG, TC, LDL-C, Scr and UA. Model 3 was adjusted for the variables in model 2 plus history of cardiometabolic diseases (for the other diseases analyses), including hypertension, diabetes, heart disease and stroke.

Table S8 Joint effect of CVAI and hs-CRP on the risk of cardiometabolic diseases (sensitivity analysis 1#)

| **Diseases** | **Crude model** | |  | **Model 1** | |  | **Model 2** | |  | **Model 3** | |
| --- | --- | --- | --- | --- | --- | --- | --- | --- | --- | --- | --- |
| **HR (95% CI)** | ***P*-value** |  | **HR (95% CI)** | ***P*-value** |  | **HR (95% CI)** | ***P*-value** |  | **HR (95% CI)** | ***P*-value** |
| **Hypertension** |  |  |  |  |  |  |  |  |  |  |  |
| CVAI <93.32 & hs-CRP <1 | Reference |  |  | Reference |  |  | Reference |  |  | Reference |  |
| CVAI <93.32 & 1≤ hs-CRP <3 | 0.93 (0.78-1.11) | 0.427 |  | 0.91 (0.76-1.09) | 0.320 |  | 0.87 (0.73-1.04) | 0.134 |  | 0.87 (0.73-1.05) | 0.145 |
| CVAI <93.32 & hs-CRP ≥3 | 1.16 (0.93-1.45) | 0.185 |  | 1.11 (0.89-1.39) | 0.357 |  | 1.08 (0.86-1.35) | 0.497 |  | 1.08 (0.87-1.35) | 0.494 |
| CVAI ≥93.32 & hs-CRP <1 | 1.65 (1.43-1.92) | < 0.001 |  | 1.57 (1.35-1.83) | < 0.001 |  | 1.32 (1.14-1.54) | < 0.001 |  | 1.31 (1.12-1.52) | 0.001 |
| CVAI ≥93.32 & 1≤ hs-CRP <3 | 1.89 (1.64-2.19) | < 0.001 |  | 1.83 (1.58-2.13) | < 0.001 |  | 1.46 (1.25-1.71) | < 0.001 |  | 1.43 (1.23-1.67) | < 0.001 |
| CVAI ≥93.32 & hs-CRP ≥3 | 2.07 (1.71-2.51) | < 0.001 |  | 1.97 (1.63-2.39) | < 0.001 |  | 1.47 (1.21-1.80) | < 0.001 |  | 1.45 (1.19-1.77) | < 0.001 |
| **Diabetes** |  |  |  |  |  |  |  |  |  |  |  |
| CVAI <93.32 & hs-CRP <1 | Reference |  |  | Reference |  |  | Reference |  |  | Reference |  |
| CVAI <93.32 & 1≤ hs-CRP <3 | 0.96 (0.73-1.26) | 0.962 |  | 0.97 (0.74-1.27) | 0.819 |  | 0.95 (0.72-1.25) | 0.701 |  | 0.94 (0.72-1.24) | 0.679 |
| CVAI <93.32 & hs-CRP ≥3 | 1.43 (1.04-1.96) | 0.027 |  | 1.45 (1.05-1.99) | 0.022 |  | 1.41 (1.03-1.94) | 0.032 |  | 1.42 (1.03-1.95) | 0.031 |
| CVAI ≥93.32 & hs-CRP <1 | 2.06 (1.68-2.52) | < 0.001 |  | 2.05 (1.67-2.51) | < 0.001 |  | 1.78 (1.45-2.19) | < 0.001 |  | 1.72 (1.40-2.11) | < 0.001 |
| CVAI ≥93.32 & 1≤ hs-CRP <3 | 2.54 (2.09-3.07) | < 0.001 |  | 2.53 (2.08-3.08) | < 0.001 |  | 2.09 (1.71-2.56) | < 0.001 |  | 1.99 (1.63-2.44) | < 0.001 |
| CVAI ≥93.32 & hs-CRP ≥3 | 2.80 (2.23-3.52) | < 0.001 |  | 2.80 (2.23-3.53) | < 0.001 |  | 2.24 (1.76-2.85) | < 0.001 |  | 2.08 (1.63-2.65) | < 0.001 |
| **Heart disease** |  |  |  |  |  |  |  |  |  |  |  |
| CVAI <93.32 & hs-CRP <1 | Reference |  |  | Reference |  |  | Reference |  |  | Reference |  |
| CVAI <93.32 & 1≤ hs-CRP <3 | 1.06 (0.87-1.29) | 0.561 |  | 1.06 (0.87-1.28) | 0.575 |  | 1.06 (0.87-1.28) | 0.579 |  | 1.05 (0.87-1.28) | 0.603 |
| CVAI <93.32 & hs-CRP ≥3 | 1.13 (0.88-1.46) | 0.321 |  | 1.13 (0.88-1.45) | 0.351 |  | 1.12 (0.87-1.44) | 0.376 |  | 1.12 (0.87-1.44) | 0.385 |
| CVAI ≥93.32 & hs-CRP <1 | 1.48 (1.26-1.74) | < 0.001 |  | 1.37 (1.16-1.61) | < 0.001 |  | 1.32 (1.12-1.56) | 0.001 |  | 1.30 (1.10-1.53) | 0.002 |
| CVAI ≥93.32 & 1≤ hs-CRP <3 | 1.69 (1.45-1.97) | < 0.001 |  | 1.52 (1.30-1.90) | < 0.001 |  | 1.46 (1.24-1.72) | < 0.001 |  | 1.42 (1.10-1.67) | < 0.001 |
| CVAI ≥93.32 & hs-CRP ≥3 | 1.78 (1.48-2.14) | < 0.001 |  | 1.57 (1.30-1.90) | < 0.001 |  | 1.49 (1.22-1.81) | < 0.001 |  | 1.44 (1.18-1.75) | < 0.001 |
| **Stroke** |  |  |  |  |  |  |  |  |  |  |  |
| CVAI <93.32 & hs-CRP <1 | Reference |  |  | Reference |  |  | Reference |  |  | Reference |  |
| CVAI <93.32 & 1≤ hs-CRP <3 | 1.53 (1.16-2.00) | 0.002 |  | 1.46 (1.11-1.91) | 0.007 |  | 1.44 (1.10-1.890 | 0.009 |  | 1.43 (1.09-1.88) | 0.010 |
| CVAI <93.32 & hs-CRP ≥3 | 1.79 (1.29-2.50) | 0.001 |  | 1.62 (1.16-2.26) | 0.004 |  | 1.62 (1.16-2.26) | 0.005 |  | 1.64 (1.17-2.29) | 0.004 |
| CVAI ≥93.32 & hs-CRP <1 | 1.96 (1.56-2.47) | < 0.001 |  | 1.80 (1.42-2.27) | < 0.001 |  | 1.62 (1.28-2.04) | < 0.001 |  | 1.55 (1.22-1.96) | < 0.001 |
| CVAI ≥93.32 & 1≤ hs-CRP <3 | 2.78 (2.25-3.44) | < 0.001 |  | 2.56 (2.07-3.17) | < 0.001 |  | 2.21 (1.77-2.75) | < 0.001 |  | 2.07 (1.66-2.59) | < 0.001 |
| CVAI ≥93.32 & hs-CRP ≥3 | 2.93 (2.29-3.74) | < 0.001 |  | 2.59 (2.02-3.33) | < 0.001 |  | 2.09 (1.62-2.71) | < 0.001 |  | 1.94 (1.50-2.52) | < 0.001 |

# Sensitivity analysis by redefined co-exposure stratified by CVAI (median) and hs-CRP thresholds (1, 3 mg/L). Results are shown as hazard ratios (95% CI) derived from Cox regression models. Model 1 adjusted for age, sex, smoking, drinking, and education. Model 2 further adjusted for SBP, FPG, TC, LDL-C, Scr and UA. Model 3 was adjusted for the variables in model 2 plus history of cardiometabolic disease (for the other diseases analyses), including hypertension, diabetes, heart disease and stroke.

Table S9 Joint effect of CVAI and hs-CRP on the risk of cardiometabolic diseases (sensitivity analysis 2#)

| **Diseases** | **Crude model** | |  | **Model 1** | |  | **Model 2** | |  | **Model 3** | |
| --- | --- | --- | --- | --- | --- | --- | --- | --- | --- | --- | --- |
| **HR (95% CI)** | ***P*-value** |  | **HR (95% CI)** | ***P*-value** |  | **HR (95% CI)** | ***P*-value** |  | **HR (95% CI)** | ***P*-value** |
| **Hypertension** |  |  |  |  |  |  |  |  |  |  |  |
| CVAI <93.32 & hs-CRP <1 | Reference |  |  | Reference |  |  | Reference |  |  | Reference |  |
| CVAI <93.32 & hs-CRP ≥1 | 1.00 (0.84-1.19) | 0.996 |  | 0.97 (0.82-1.16) | 0.751 |  | 0.94 (0.79-1.11) | 0.452 |  | 0.94 (0.79-1.12) | 0.467 |
| CVAI ≥93.32 & hs-CRP <1 | 1.68 (1.42-1.98) | < 0.001 |  | 1.60 (1.35-1.89) | < 0.001 |  | 1.34 (1.13-1.59) | 0.001 |  | 1.33 (1.12-1.58) | 0.001 |
| CVAI ≥93.32 & hs-CRP ≥1 | 1.91 (1.64-2.22) | < 0.001 |  | 1.85 (1.59-2.16) | < 0.001 |  | 1.46 (1.25-1.72) | < 0.001 |  | 1.44 (1.23-1.70) | < 0.001 |
| **Diabetes** |  |  |  |  |  |  |  |  |  |  |  |
| CVAI <93.32 & hs-CRP <1 | Reference |  |  | Reference |  |  | Reference |  |  | Reference |  |
| CVAI <93.32 & hs-CRP ≥1 | 1.01 (0.79-1.30) | 0.926 |  | 1.02 (0.79-1.32) | 0.868 |  | 1.00 (0.78-1.29) | 0.993 |  | 1.00 (0.77-1.28) | 0.982 |
| CVAI ≥93.32 & hs-CRP <1 | 1.77 (1.41-2.22) | < 0.001 |  | 1.76 (1.41-2.21) | < 0.001 |  | 1.54 (1.23-1.94) | < 0.001 |  | 1.50 (1.19-1.89) | 0.001 |
| CVAI ≥93.32 & hs-CRP ≥1 | 2.57 (2.12-3.11) | < 0.001 |  | 2.58 (2.12-3.13) | < 0.001 |  | 2.11 (1.72-2.58) | < 0.001 |  | 2.02 (1.65-2.47) | < 0.001 |
| **Heart disease** |  |  |  |  |  |  |  |  |  |  |  |
| CVAI <93.32 & hs-CRP <1 | Reference |  |  | Reference |  |  | Reference |  |  | Reference |  |
| CVAI <93.32 & hs-CRP ≥1 | 1.09 (0.91-1.31) | 0.354 |  | 1.08 (0.90-1.30) | 0.385 |  | 1.08 (0.90-1.30) | 0.410 |  | 1.08 (0.90-1.29) | 0.436 |
| CVAI ≥93.32 & hs-CRP <1 | 1.47 (1.24-1.75) | < 0.001 |  | 1.36 (1.14-1.62) | 0.001 |  | 1.30 (1.09-1.55) | 0.003 |  | 1.28 (1.07-1.52) | 0.007 |
| CVAI ≥93.32 & hs-CRP ≥1 | 1.66 (1.43-1.92) | < 0.001 |  | 1.48 (1.27-1.73) | < 0.001 |  | 1.40 (1.19-1.65) | < 0.001 |  | 1.35 (1.14-1.59) | < 0.001 |
| **Stroke** |  |  |  |  |  |  |  |  |  |  |  |
| CVAI <93.32 & hs-CRP <1 | Reference |  |  | Reference |  |  | Reference |  |  | Reference |  |
| CVAI <93.32 & hs-CRP ≥1 | 1.56 (1.22-2.00) | < 0.001 |  | 1.48 (1.15-1.89) | 0.002 |  | 1.47 (1.15-1.88) | 0.002 |  | 1.47 (1.15-1.88) | 0.002 |
| CVAI ≥93.32 & hs-CRP <1 | 1.95 (1.54-2.47) | < 0.001 |  | 1.78 (1.40-2.26) | < 0.001 |  | 1.61 (1.27-2.05) | < 0.001 |  | 1.54 (1.21-1.96) | < 0.001 |
| CVAI ≥93.32 & hs-CRP ≥1 | 2.77 (2.26-3.39) | < 0.001 |  | 2.50 (2.03-3.07) | < 0.001 |  | 2.13 (1.72-2.64) | < 0.001 |  | 2.00 (1.61-2.49) | < 0.001 |

# Sensitivity analysis by excluding those with endpoints occurring within the first follow-up visit. Results are shown as hazard ratios (95% CI) derived from Cox regression models. Model 1 adjusted for age, sex, smoking, drinking, and education. Model 2 further adjusted for SBP, FPG, TC, LDL-C, Scr and UA. Model 3 was adjusted for the variables in model 2 plus history of cardiometabolic disease (for the other diseases analyses), including hypertension, diabetes, heart disease and stroke.

Table S10 Joint effect of CVAI and hs-CRP on the risk of cardiometabolic diseases (sensitivity analysis 3#)

| **Diseases** | **Crude model** | |  | **Model 1** | |  | **Model 2** | |  | **Model 3** | |
| --- | --- | --- | --- | --- | --- | --- | --- | --- | --- | --- | --- |
| **HR (95% CI)** | ***P*-value** |  | **HR (95% CI)** | ***P*-value** |  | **HR (95% CI)** | ***P*-value** |  | **HR (95% CI)** | ***P*-value** |
| **Hypertension** |  |  |  |  |  |  |  |  |  |  |  |
| CVAI <93.32 & hs-CRP <1 | Reference |  |  | Reference |  |  | Reference |  |  | Reference |  |
| CVAI <93.32 & hs-CRP ≥1 | 0.99 (0.85-1.17) | 0.946 |  | 0.97 (0.83-1.14) | 0.724 |  | 0.93 (0.79-1.10) | 0.393 |  | 0.94 (0.80-1.10) | 0.430 |
| CVAI ≥93.32 & hs-CRP <1 | 1.65 (1.42-1.93) | < 0.001 |  | 1.57 (1.35-1.84) | < 0.001 |  | 1.32 (1.13-1.55) | < 0.001 |  | 1.31 (1.12-1.53) | 0.001 |
| CVAI ≥93.32 & hs-CRP ≥1 | 1.91 (1.66-2.19) | < 0.001 |  | 1.84 (1.60-2.12) | < 0.001 |  | 1.44 (1.25-1.67) | < 0.001 |  | 1.41 (1.22-1.63) | < 0.001 |
| **Diabetes** |  |  |  |  |  |  |  |  |  |  |  |
| CVAI <93.32 & hs-CRP <1 | Reference |  |  | Reference |  |  | Reference |  |  | Reference |  |
| CVAI <93.32 & hs-CRP ≥1 | 1.13 (0.89-1.44) | 0.321 |  | 1.14 (0.90-1.46) | 0.285 |  | 1.11 (0.87-1.42) | 0.392 |  | 1.11 (0.87-1.42) | 0.400 |
| CVAI ≥93.32 & hs-CRP <1 | 2.08 (1.69-2.58) | < 0.001 |  | 2.07 (1.67-2.56) | < 0.001 |  | 1.80 (1.45-2.24) | < 0.001 |  | 1.74 (1.40-2.16) | < 0.001 |
| CVAI ≥93.32 & hs-CRP ≥1 | 2.68 (2.23-3.23) | < 0.001 |  | 2.66 (2.20-3.22) | < 0.001 |  | 2.18 (1.79-2.66) | < 0.001 |  | 2.06 (1.69-2.52) | < 0.001 |
| **Heart disease** |  |  |  |  |  |  |  |  |  |  |  |
| CVAI <93.32 & hs-CRP <1 | Reference |  |  | Reference |  |  | Reference |  |  | Reference |  |
| CVAI <93.32 & hs-CRP ≥1 | 1.08 (0.91-1.29) | 0.381 |  | 1.08 (0.90-1.28) | 0.413 |  | 1.08 (0.90-1.28) | 0.414 |  | 1.07 (0.90-1.28) | 0.430 |
| CVAI ≥93.32 & hs-CRP <1 | 1.47 (1.25-1.74) | < 0.001 |  | 1.36 (1.15-1.61) | < 0.001 |  | 1.32 (1.12-1.57) | 0.001 |  | 1.30 (1.10-1.54) | 0.003 |
| CVAI ≥93.32 & hs-CRP ≥1 | 1.67 (1.45-1.93) | < 0.001 |  | 1.49 (1.29-1.73) | < 0.001 |  | 1.45 (1.24-1.69) | < 0.001 |  | 1.40 (1.20-1.64) | < 0.001 |
| **Stroke** |  |  |  |  |  |  |  |  |  |  |  |
| CVAI <93.32 & hs-CRP <1 | Reference |  |  | Reference |  |  | Reference |  |  | Reference |  |
| CVAI <93.32 & hs-CRP ≥1 | 1.67 (1.30-2.14) | < 0.001 |  | 1.56 (1.21-2.01) | 0.001 |  | 1.54 (1.20-1.98) | 0.001 |  | 1.55 (1.20-1.99) | 0.001 |
| CVAI ≥93.32 & hs-CRP <1 | 1.97 (1.55-2.51) | < 0.001 |  | 1.81 (1.42-2.31) | < 0.001 |  | 1.62 (1.27-2.07) | < 0.001 |  | 1.55 (1.21-1.98) | 0.001 |
| CVAI ≥93.32 & hs-CRP ≥1 | 2.90 (2.36-3.57) | < 0.001 |  | 2.65 (2.15-3.27) | < 0.001 |  | 2.23 (1.79-2.78) | < 0.001 |  | 2.07 (1.66-2.59) | < 0.001 |

# Sensitivity analysis by excluding those with kidney diseases at baseline. Results are shown as hazard ratios (95% CI) derived from Cox regression models. Model 1 adjusted for age, sex, smoking, drinking, and education. Model 2 further adjusted for SBP, FPG, TC, LDL-C, Scr and UA. Model 3 was adjusted for the variables in model 2 plus history of cardiometabolic disease (for the other diseases analyses), including hypertension, diabetes, heart disease and stroke.

Table S11 Joint effect of CVAI and hs-CRP on the risk of cardiometabolic diseases (sensitivity analysis 4#)

| **Diseases** | **Crude model** | |  | **Model 1** | |  | **Model 2** | |  | **Model 3** | |
| --- | --- | --- | --- | --- | --- | --- | --- | --- | --- | --- | --- |
| **HR (95% CI)** | ***P*-value** |  | **HR (95% CI)** | ***P*-value** |  | **HR (95% CI)** | ***P*-value** |  | **HR (95% CI)** | ***P*-value** |
| **Hypertension** |  |  |  |  |  |  |  |  |  |  |  |
| CVAI <93.32 & hs-CRP <1 | Reference |  |  | Reference |  |  | Reference |  |  | Reference |  |
| CVAI <93.32 & hs-CRP ≥1 | 0.98 (0.84-1.15) | 0.800 |  | 0.95 (0.81-1.12) | 0.548 |  | 0.92 (0.78-1.08) | 0.279 |  | 0.92 (0.78-1.08) | 0.292 |
| CVAI ≥93.32 & hs-CRP <1 | 1.65 (1.43-1.92) | < 0.001 |  | 1.57 (1.35-1.82) | < 0.001 |  | 1.32 (1.13-1.53) | < 0.001 |  | 1.30 (1.12-1.52) | 0.001 |
| CVAI ≥93.32 & hs-CRP ≥1 | 1.93 (1.68-2.20) | < 0.001 |  | 1.86 (1.62-2.13) | < 0.001 |  | 1.44 (1.25-1.67) | < 0.001 |  | 1.41 (1.22-1.63) | < 0.001 |
| **Diabetes** |  |  |  |  |  |  |  |  |  |  |  |
| CVAI <93.32 & hs-CRP <1 | Reference |  |  | Reference |  |  | Reference |  |  | Reference |  |
| CVAI <93.32 & hs-CRP ≥1 | 1.07 (0.84-1.36) | 0.593 |  | 1.07 (0.85-1.36) | 0.563 |  | 1.05 (0.83-1.34) | 0.666 |  | 1.05 (0.83-1.34) | 0.680 |
| CVAI ≥93.32 & hs-CRP <1 | 2.06 (1.68-2.52) | < 0.001 |  | 2.05 (1.67-2.51) | < 0.001 |  | 1.79 (1.45-2.20) | < 0.001 |  | 1.72 (1.40-2.12) | < 0.001 |
| CVAI ≥93.32 & hs-CRP ≥1 | 2.58 (2.16-3.09) | < 0.001 |  | 2.59 (2.15-3.11) | < 0.001 |  | 2.12 (1.75-2.57) | < 0.001 |  | 2.00 (1.65-2.43) | < 0.001 |
| **Heart disease** |  |  |  |  |  |  |  |  |  |  |  |
| CVAI <93.32 & hs-CRP <1 | Reference |  |  | Reference |  |  | Reference |  |  | Reference |  |
| CVAI <93.32 & hs-CRP ≥1 | 1.10 (0.32-1.31) | 0.291 |  | 1.09 (0.92-1.30) | 0.326 |  | 1.09 (0.92-1.30) | 0.326 |  | 1.09 (0.91-1.30) | 0.344 |
| CVAI ≥93.32 & hs-CRP <1 | 1.48 (1.26-1.74) | < 0.001 |  | 1.36 (1.16-1.60) | < 0.001 |  | 1.32 (1.12-1.55) | 0.001 |  | 1.29 (1.10-1.53) | 0.002 |
| CVAI ≥93.32 & hs-CRP ≥1 | 1.73 (1.50-1.99) | < 0.001 |  | 1.55 (1.34-1.79) | < 0.001 |  | 1.48 (1.27-1.73) | < 0.001 |  | 1.44 (1.23-1.68) | < 0.001 |
| **Stroke** |  |  |  |  |  |  |  |  |  |  |  |
| CVAI <93.32 & hs-CRP <1 | Reference |  |  | Reference |  |  | Reference |  |  | Reference |  |
| CVAI <93.32 & hs-CRP ≥1 | 1.57 (1.22-2.01) | < 0.001 |  | 1.47 (1.15-1.89) | 0.002 |  | 1.46 (1.14-1.87) | 0.003 |  | 1.46 (1.14-1.87) | 0.003 |
| CVAI ≥93.32 & hs-CRP <1 | 1.96 (1.56-2.47) | < 0.001 |  | 1.80 (1.42-2.27) | < 0.001 |  | 1.61 (1.27-2.03) | < 0.001 |  | 1.54 (1.22-1.95) | < 0.001 |
| CVAI ≥93.32 & hs-CRP ≥1 | 2.84 (2.33-3.47) | < 0.001 |  | 2.59 (2.11-3.17) | < 0.001 |  | 2.16 (1.75-2.67) | < 0.001 |  | 2.03 (1.64-2.51) | < 0.001 |

# Sensitivity analysis by excluding those with hs-CRP ≥10mg/L. Results are shown as hazard ratios (95% CI) derived from Cox regression models. Model 1 adjusted for age, sex, smoking, drinking, and education. Model 2 further adjusted for SBP, FPG, TC, LDL-C, Scr and UA. Model 3 was adjusted for the variables in model 2 plus history of cardiometabolic disease (for the other diseases analyses), including hypertension, diabetes, heart disease and stroke.

Table S12 Subgroup analysis for the joint effect of CVAI and hs-CRP on the risk of cardiometabolic diseases by age

| **Diseases** | **Age <60 years** | |  | **Age ≥60 years** | | ***P* for interaction#** |
| --- | --- | --- | --- | --- | --- | --- |
| **HR (95% CI)** | ***P*-value** |  | **HR (95% CI)** | ***P*-value** |
| **Hypertension** |  |  |  |  |  |  |
| CVAI <93.32 & hs-CRP <1 | Reference |  |  | Reference |  |  |
| CVAI <93.32 & hs-CRP ≥1 | 0.90 (0.74-1.10) | 0.297 |  | 0.98 (0.76-1.27) | 0.901 | 0.621 |
| CVAI ≥93.32 & hs-CRP <1 | 1.30 (1.07-1.59) | 0.010 |  | 1.30 (1.02-1.65) | 0.033 | 0.778 |
| CVAI ≥93.32 & hs-CRP ≥1 | 1.47 (1.22-1.76) | < 0.001 |  | 1.41 (1.12-1.77) | 0.004 | 0.491 |
| **Diabetes** |  |  |  |  |  |  |
| CVAI <93.32 & hs-CRP <1 | Reference |  |  | Reference |  |  |
| CVAI <93.32 & hs-CRP ≥1 | 1.07 (0.80-1.43) | 0.670 |  | 1.11 (0.76-1.62) | 0.587 | 0.984 |
| CVAI ≥93.32 & hs-CRP <1 | 1.60 (1.21-2.10) | 0.001 |  | 1.80 (1.30-2.49) | < 0.001 | 0.765 |
| CVAI ≥93.32 & hs-CRP ≥1 | 2.04 (1.59-2.61) | < 0.001 |  | 1.98 (1.46-2.69) | < 0.001 | 0.505 |
| **Heart diseases** |  |  |  |  |  |  |
| CVAI <93.32 & hs-CRP <1 | Reference |  |  | Reference |  |  |
| CVAI <93.32 & hs-CRP ≥1 | 1.03 (0.82-1.30) | 0.809 |  | 1.10 (0.85-1.42) | 0.470 | 0.739 |
| CVAI ≥93.32 & hs-CRP <1 | 1.26 (1.00-1.59) | 0.054 |  | 1.29 (1.02-1.64) | 0.034 | 0.643 |
| CVAI ≥93.32 & hs-CRP ≥1 | 1.62 (1.32-1.99) | < 0.001 |  | 1.25 (1.00-1.56) | 0.053 | 0.003 |
| **Stroke** |  |  |  |  |  |  |
| CVAI <93.32 & hs-CRP <1 | Reference |  |  | Reference |  |  |
| CVAI <93.32 & hs-CRP ≥1 | 1.55 (1.11-2.18) | 0.011 |  | 1.43 (1.01-2.02) | 0.042 | 0.594 |
| CVAI ≥93.32 & hs-CRP <1 | 1.80 (1.29-2.51) | 0.001 |  | 1.32 (0.95-1.85) | 0.098 | 0.099 |
| CVAI ≥93.32 & hs-CRP ≥1 | 1.92 (1.41-2.61) | < 0.001 |  | 1.99 (1.48-2.66) | < 0.001 | 0.470 |

# *P* for interaction represents results of multiplicative interaction analyses between joint effect (CVAI and hs-CRP) and age. Results are shown as hazard ratios (95% CI) derived from Cox regression models adjusted for age, sex, smoking, drinking, education, SBP, FPG, TC, LDL-C, Scr, UA, and history of cardiometabolic disease (for the other diseases analyses), including hypertension, diabetes, heart disease and stroke.

Table S13 Subgroup analysis for the joint effect of CVAI and hs-CRP on the risk of cardiometabolic diseases by sex

| **Diseases** | **Women** | |  | **Men** | | ***P* for interaction#** |
| --- | --- | --- | --- | --- | --- | --- |
| **HR (95% CI)** | ***P*-value** |  | **HR (95% CI)** | ***P*-value** |
| **Hypertension** |  |  |  |  |  |  |
| CVAI <93.32 & hs-CRP <1 | Reference |  |  | Reference |  |  |
| CVAI <93.32 & hs-CRP ≥1 | 0.84 (0.66-1.05) | 0.127 |  | 1.03 (0.83-1.28) | 0.763 | 0.199 |
| CVAI ≥93.32 & hs-CRP <1 | 1.33 (1.09-1.64) | 0.006 |  | 1.27 (1.00-1.60) | 0.047 | 0.713 |
| CVAI ≥93.32 & hs-CRP ≥1 | 1.45 (1.20-1.76) | < 0.001 |  | 1.41 (1.14-1.75) | 0.002 | 0.836 |
| **Diabetes** |  |  |  |  |  |  |
| CVAI <93.32 & hs-CRP <1 | Reference |  |  | Reference |  |  |
| CVAI <93.32 & hs-CRP ≥1 | 1.13 (0.82-1.56) | 0.460 |  | 1.04 (0.75-1.44) | 0.833 | 0.696 |
| CVAI ≥93.32 & hs-CRP <1 | 1.83 (1.39-2.70) | < 0.001 |  | 1.27 (1.14-2.16) | 0.006 | 0.430 |
| CVAI ≥93.32 & hs-CRP ≥1 | 2.09 (1.62-2.70) | < 0.001 |  | 1.92 (1.44-2.56) | < 0.001 | 0.592 |
| **Heart diseases** |  |  |  |  |  |  |
| CVAI <93.32 & hs-CRP <1 | Reference |  |  | Reference |  |  |
| CVAI <93.32 & hs-CRP ≥1 | 0.95 (0.75-1.20) | 0.662 |  | 1.26 (0.98-1.62) | 0.077 | 0.090 |
| CVAI ≥93.32 & hs-CRP <1 | 1.24 (1.00-1.53) | 0.053 |  | 1.50 (1.16-1.96) | 0.002 | 0.118 |
| CVAI ≥93.32 & hs-CRP ≥1 | 1.48 (1.22-1.80) | < 0.001 |  | 1.42 (1.11-1.82) | 0.005 | 0.655 |
| **Stroke** |  |  |  |  |  |  |
| CVAI <93.32 & hs-CRP <1 | Reference |  |  | Reference |  |  |
| CVAI <93.32 & hs-CRP ≥1 | 1.78 (1.25-2.54) | 0.001 |  | 1.32 (0.95-1.84) | 0.096 | 0.268 |
| CVAI ≥93.32 & hs-CRP <1 | 1.64 (1.18-2.28) | 0.003 |  | 1.50 (1.07-2.10) | 0.020 | 0.853 |
| CVAI ≥93.32 & hs-CRP ≥1 | 2.11 (1.56-2.86) | < 0.001 |  | 2.01 (1.49-2.70) | < 0.001 | 0.736 |

# *P* for interaction represents results of multiplicative interaction analyses between joint effect (CVAI and hs-CRP) and sex. Results are shown as hazard ratios (95% CI) derived from Cox regression models adjusted for age, smoking, drinking, education, SBP, FPG, TC, LDL-C, Scr, UA, and history of cardiometabolic disease (for the other diseases analyses), including hypertension, diabetes, heart disease and stroke.

Table S14 Subgroup analysis for the joint effect of CVAI and hs-CRP on the risk of cardiometabolic diseases by BMI stratums

| **Diseases** | **BMI <24 kg/m2** | |  | **BMI ≥24 kg/m2** | | ***P* for interaction#** |
| --- | --- | --- | --- | --- | --- | --- |
| **HR (95% CI)** | ***P*-value** |  | **HR (95% CI)** | ***P*-value** |
| **Hypertension** |  |  |  |  |  |  |
| CVAI <93.32 & hs-CRP <1 | Reference |  |  | Reference |  |  |
| CVAI <93.32 & hs-CRP ≥1 | 0.95 (0.80-1.13) | 0.555 |  | 0.81 (0.53-1.22) | 0.313 | 0.384 |
| CVAI ≥93.32 & hs-CRP <1 | 1.19 (0.95-1.50) | 0.138 |  | 1.04 (0.78-1.38) | 0.810 | 0.296 |
| CVAI ≥93.32 & hs-CRP ≥1 | 1.39 (1.12-1.73) | 0.003 |  | 1.10 (0.83-1.46) | 0.517 | 0.062 |
| **Diabetes** |  |  |  |  |  |  |
| CVAI <93.32 & hs-CRP <1 | Reference |  |  | Reference |  |  |
| CVAI <93.32 & hs-CRP ≥1 | 1.07 (0.83-1.38) | 0.603 |  | 1.12 (0.64-1.96) | 0.701 | 0.816 |
| CVAI ≥93.32 & hs-CRP <1 | 1.81 (1.34-2.45) | < 0.001 |  | 1.47 (0.96-2.25) | 0.076 | 0.257 |
| CVAI ≥93.32 & hs-CRP ≥1 | 1.32 (0.96-1.80) | 0.087 |  | 2.01 (1.33-3.03) | 0.001 | 0.131 |
| **Heart diseases** |  |  |  |  |  |  |
| CVAI <93.32 & hs-CRP <1 | Reference |  |  | Reference |  |  |
| CVAI <93.32 & hs-CRP ≥1 | 1.06 (0.88-1.27) | 0.535 |  | 1.11 (0.68-1.79) | 0.678 | 0.892 |
| CVAI ≥93.32 & hs-CRP <1 | 1.06 (0.82-1.36) | 0.658 |  | 1.46 (1.03-2.08) | 0.036 | 0.315 |
| CVAI ≥93.32 & hs-CRP ≥1 | 1.01 (0.80-1.28) | 0.934 |  | 1.67 (1.18-2.36) | 0.004 | 0.065 |
| **Stroke** |  |  |  |  |  |  |
| CVAI <93.32 & hs-CRP <1 | Reference |  |  | Reference |  |  |
| CVAI <93.32 & hs-CRP ≥1 | 1.52 (1.18-1.96) | 0.001 |  | 1.45 (0.66-3.19) | 0.354 | 0.967 |
| CVAI ≥93.32 & hs-CRP <1 | 1.39 (0.99-1.95) | 0.059 |  | 1.80 (1.01-3.23) | 0.048 | 0.347 |
| CVAI ≥93.32 & hs-CRP ≥1 | 2.01 (1.51-2.69) | < 0.001 |  | 2.23 (1.26-3.96) | 0.006 | 0.535 |

# *P* for interaction represents results of multiplicative interaction analyses between joint effect (CVAI and hs-CRP) and BMI. Results are shown as hazard ratios (95% CI) derived from Cox regression models adjusted for age, sex, smoking, drinking, education, SBP, FPG, TC, LDL-C, Scr, UA, and history of cardiometabolic disease (for the other diseases analyses), including hypertension, diabetes, heart disease and stroke.

Table S15 Subgroup analysis for the joint effect of CVAI and hs-CRP on the risk of cardiometabolic diseases by abdominal obesity

| **Diseases** | **Non-obesity** | |  | **Abdominal obesity** | | ***P* for interaction#** |
| --- | --- | --- | --- | --- | --- | --- |
| **HR (95% CI)** | ***P*-value** |  | **HR (95% CI)** | ***P*-value** |
| **Hypertension** |  |  |  |  |  |  |
| CVAI <93.32 & hs-CRP <1 | Reference |  |  | Reference |  |  |
| CVAI <93.32 & hs-CRP ≥1 | 0.94 (0.79-1.11) | 0.450 |  | 0.86 (0.54-1.34) | 0.498 | 0.617 |
| CVAI ≥93.32 & hs-CRP <1 | 1.18 (0.93-1.50) | 0.174 |  | 1.11 (0.82-1.51) | 0.511 | 0.430 |
| CVAI ≥93.32 & hs-CRP ≥1 | 1.35 (1.08-1.69) | 0.009 |  | 1.21 (0.90-1.63) | 0.216 | 0.199 |
| **Diabetes** |  |  |  |  |  |  |
| CVAI <93.32 & hs-CRP <1 | Reference |  |  | Reference |  |  |
| CVAI <93.32 & hs-CRP ≥1 | 0.99 (0.77-1.27) | 0.920 |  | 1.90 (0.98-3.70) | 0.059 | 0.076 |
| CVAI ≥93.32 & hs-CRP <1 | 1.44 (1.04-1.99) | 0.030 |  | 2.53 (1.50-4.29) | 0.001 | 0.128 |
| CVAI ≥93.32 & hs-CRP ≥1 | 1.39 (1.02-1.90) | 0.035 |  | 3.15 (1.87-5.29) | < 0.001 | 0.021 |
| **Heart diseases** |  |  |  |  |  |  |
| CVAI <93.32 & hs-CRP <1 | Reference |  |  | Reference |  |  |
| CVAI <93.32 & hs-CRP ≥1 | 1.07 (0.89-1.28) | 0.486 |  | 1.00 (0.60-1.67) | 0.990 | 0.795 |
| CVAI ≥93.32 & hs-CRP <1 | 1.17 (0.90-1.51) | 0.251 |  | 1.35 (0.95-1.93) | 0.097 | 0.771 |
| CVAI ≥93.32 & hs-CRP ≥1 | 1.04 (0.80-1.34) | 0.777 |  | 1.58 (1.11-2.24) | 0.010 | 0.153 |
| **Stroke** |  |  |  |  |  |  |
| CVAI <93.32 & hs-CRP <1 | Reference |  |  | Reference |  |  |
| CVAI <93.32 & hs-CRP ≥1 | 1.45 (1.12-1.88) | 0.004 |  | 2.27 (1.07-4.82) | 0.032 | 0.250 |
| CVAI ≥93.32 & hs-CRP <1 | 1.46 (1.02-2.08) | 0.039 |  | 1.57 (0.85-2.88) | 0.149 | 0.675 |
| CVAI ≥93.32 & hs-CRP ≥1 | 1.80 (1.32-2.46) | < 0.001 |  | 2.05 (1.13-3.73) | 0.019 | 0.501 |

# *P* for interaction represents results of multiplicative interaction analyses between joint effect (CVAI and hs-CRP) and abdominal obesity. Results are shown as hazard ratios (95% CI) derived from Cox regression models adjusted for age, sex, smoking, drinking, education, SBP, FPG, TC, LDL-C, Scr, UA, and history of cardiometabolic disease (for the other diseases analyses), including hypertension, diabetes, heart disease and stroke.

Table S16 Subgroup analysis for the joint effect of CVAI and hs-CRP on the risk of cardiometabolic diseases by smoking status

| **Diseases** | **Ever/current smokers** | |  | **Never smokers** | | ***P* for interaction#** |
| --- | --- | --- | --- | --- | --- | --- |
| **HR (95% CI)** | ***P*-value** |  | **HR (95% CI)** | ***P*-value** |
| **Hypertension** |  |  |  |  |  |  |
| CVAI <93.32 & hs-CRP <1 | Reference |  |  | Reference |  |  |
| CVAI <93.32 & hs-CRP ≥1 | 0.97 (0.77-1.23) | 0.804 |  | 0.90 (0.73-1.11) | 0.318 | 0.645 |
| CVAI ≥93.32 & hs-CRP <1 | 1.13 (0.87-1.47) | 0.361 |  | 1.41 (1.17-1.71) | < 0.001 | 0.134 |
| CVAI ≥93.32 & hs-CRP ≥1 | 1.40 (1.11-1.77) | 0.005 |  | 1.46 (1.22-1.75) | < 0.001 | 0.562 |
| **Diabetes** |  |  |  |  |  |  |
| CVAI <93.32 & hs-CRP <1 | Reference |  |  | Reference |  |  |
| CVAI <93.32 & hs-CRP ≥1 | 1.09 (0.76-1.58) | 0.639 |  | 1.08 (0.80-1.46) | 0.611 | 0.934 |
| CVAI ≥93.32 & hs-CRP <1 | 1.51 (1.03-2.21) | 0.034 |  | 1.79 (1.40-2.30) | < 0.001 | 0.290 |
| CVAI ≥93.32 & hs-CRP ≥1 | 2.24 (1.62-3.09) | < 0.001 |  | 1.90 (1.50-2.41) | < 0.001 | 0.793 |
| **Heart diseases** |  |  |  |  |  |  |
| CVAI <93.32 & hs-CRP <1 | Reference |  |  | Reference |  |  |
| CVAI <93.32 & hs-CRP ≥1 | 1.36 (1.05-1.76) | 0.019 |  | 0.88 (0.69-1.11) | 0.262 | 0.013 |
| CVAI ≥93.32 & hs-CRP <1 | 1.22 (0.91-1.63) | 0.196 |  | 1.35 (1.10-1.65) | 0.003 | 0.689 |
| CVAI ≥93.32 & hs-CRP ≥1 | 1.33 (1.03-1.73) | 0.031 |  | 1.48 (1.23-1.79) | < 0.001 | 0.654 |
| **Stroke** |  |  |  |  |  |  |
| CVAI <93.32 & hs-CRP <1 | Reference |  |  | Reference |  |  |
| CVAI <93.32 & hs-CRP ≥1 | 1.39 (0.99-1.96) | 0.057 |  | 1.61 (1.14-2.26) | 0.006 | 0.665 |
| CVAI ≥93.32 & hs-CRP <1 | 1.52 (1.07-2.18) | 0.021 |  | 1.59 (1.16-2.18) | 0.004 | 0.960 |
| CVAI ≥93.32 & hs-CRP ≥1 | 1.84 (1.34-2.52) | < 0.001 |  | 2.27 (1.70-3.02) | < 0.001 | 0.636 |

# *P* for interaction represents results of multiplicative interaction analyses between joint effect (CVAI and hs-CRP) and smoking status. Results are shown as hazard ratios (95% CI) derived from Cox regression models adjusted for age, sex, smoking, drinking, education, SBP, FPG, TC, LDL-C, Scr, UA, and history of cardiometabolic disease (for the other diseases analyses), including hypertension, diabetes, heart disease and stroke.

Table S17 Subgroup analysis for the joint effect of CVAI and hs-CRP on the risk of cardiometabolic diseases by drinking status

| **Diseases** | **Ever/current drinkers** | |  | **Never drinkers** | | ***P* for interaction#** |
| --- | --- | --- | --- | --- | --- | --- |
| **HR (95% CI)** | ***P*-value** |  | **HR (95% CI)** | ***P*-value** |
| **Hypertension** |  |  |  |  |  |  |
| CVAI <93.32 & hs-CRP <1 | Reference |  |  | Reference |  |  |
| CVAI <93.32 & hs-CRP ≥1 | 0.86 (0.68-1.08) | 0.187 |  | 1.01 (0.82-1.25) | 0.905 | 0.228 |
| CVAI ≥93.32 & hs-CRP <1 | 1.07 (0.84-1.37) | 0.581 |  | 1.47 (1.21-1.79) | < 0.001 | 0.023 |
| CVAI ≥93.32 & hs-CRP ≥1 | 1.46 (1.17-1.83) | 0.001 |  | 1.43 (1.11-1.73) | < 0.001 | 0.698 |
| **Diabetes** |  |  |  |  |  |  |
| CVAI <93.32 & hs-CRP <1 | Reference |  |  | Reference |  |  |
| CVAI <93.32 & hs-CRP ≥1 | 1.08 (0.76-1.53) | 0.665 |  | 1.07 (0.79-1.46) | 0.674 | 0.970 |
| CVAI ≥93.32 & hs-CRP <1 | 1.49 (1.06-2.09) | 0.020 |  | 1.93 (1.48-2.51) | < 0.001 | 0.182 |
| CVAI ≥93.32 & hs-CRP ≥1 | 1.90 (1.40-2.57) | < 0.001 |  | 2.12 (1.66-2.71) | < 0.001 | 0.330 |
| **Heart diseases** |  |  |  |  |  |  |
| CVAI <93.32 & hs-CRP <1 | Reference |  |  | Reference |  |  |
| CVAI <93.32 & hs-CRP ≥1 | 1.41 (1.08-1.83) | 0.012 |  | 0.90 (0.71-1.12) | 0.340 | 0.009 |
| CVAI ≥93.32 & hs-CRP <1 | 1.51 (1.15-1.97) | 0.003 |  | 1.21 (0.98-1.49) | 0.078 | 0.106 |
| CVAI ≥93.32 & hs-CRP ≥1 | 1.45 (1.12-1.87) | 0.005 |  | 1.42 (1.17-1.72) | < 0.001 | 0.570 |
| **Stroke** |  |  |  |  |  |  |
| CVAI <93.32 & hs-CRP <1 | Reference |  |  | Reference |  |  |
| CVAI <93.32 & hs-CRP ≥1 | 1.49 (1.05-2.11) | 0.025 |  | 1.51 (1.08-2.10) | 0.017 | 0.943 |
| CVAI ≥93.32 & hs-CRP <1 | 1.62 (1.14-2.29) | 0.007 |  | 1.53 (1.11-2.11) | 0.009 | 0.718 |
| CVAI ≥93.32 & hs-CRP ≥1 | 1.96 (1.43-2.69) | < 0.001 |  | 2.13 (1.60-2.84) | < 0.001 | 0.816 |

# *P* for interaction represents results of multiplicative interaction analyses between joint effect (CVAI and hs-CRP) and drinking status. Results are shown as hazard ratios (95% CI) derived from Cox regression models adjusted for age, sex, smoking, drinking, education, SBP, FPG, TC, LDL-C, Scr, UA, and history of cardiometabolic disease (for the other diseases analyses), including hypertension, diabetes, heart disease and stroke.

Table S18 Joint effect of baseline CVAI and follow-up hs-CRP on the risk of cardiometabolic diseases (longitudinal association)

| **Diseases** | **Crude model** | |  | **Partially adjusted model** | |  | **Fully adjusted model** | |
| --- | --- | --- | --- | --- | --- | --- | --- | --- |
| **HR (95% CI)** | ***P*-value** |  | **HR (95% CI)** | ***P*-value** |  | **HR (95% CI)** | ***P*-value** |
| **Hypertension** |  |  |  |  |  |  |  |  |
| T1_CVAI <93.32 & T2_hs-CRP <1 | Reference |  |  | Reference |  |  | Reference |  |
| T1_CVAI <93.32 & T2_hs-CRP ≥1 | 1.33 (1.06-1.67) | 0.013 |  | 1.30 (1.04-1.63) | 0.023 |  | 1.31 (1.04-1.64) | 0.020 |
| T1_CVAI ≥93.32 & T2_hs-CRP <1 | 1.52 (1.12-2.07) | 0.008 |  | 1.28 (0.94-1.75) | 0.123 |  | 1.26 (0.92-1.72) | 0.154 |
| T1_CVAI ≥93.32 & T2_hs-CRP ≥1 | 2.19 (1.77-2.71) | < 0.001 |  | 1.78 (1.43-2.23) | < 0.001 |  | 1.77 (1.42-2.21) | < 0.001 |
| **Diabetes** |  |  |  |  |  |  |  |  |
| T1_CVAI <93.32 & T2_hs-CRP <1 | Reference |  |  | Reference |  |  | Reference |  |
| T1_CVAI <93.32 & T2_hs-CRP ≥1 | 1.55 (1.15-2.18) | 0.005 |  | 1.54 (1.11-2.12) | 0.009 |  | 1.53 (1.10-2.11) | 0.011 |
| T1_CVAI ≥93.32 & T2_hs-CRP <1 | 2.50 (1.72-3.61) | < 0.001 |  | 2.13 (1.46-3.10) | < 0.001 |  | 2.06 (1.41-3.00) | < 0.001 |
| T1_CVAI ≥93.32 & T2_hs-CRP ≥1 | 2.88 (2.16-3.85) | < 0.001 |  | 2.38 (1.77-3.22) | < 0.001 |  | 2.31 (1.71-3.12) | < 0.001 |
| **Heart diseases** |  |  |  |  |  |  |  |  |
| T1_CVAI <93.32 & T2_hs-CRP <1 | Reference |  |  | Reference |  |  | Reference |  |
| T1_CVAI <93.32 & T2_hs-CRP ≥1 | 1.15 (0.91-1.45) | 0.255 |  | 1.14 (0.90-1.44) | 0.270 |  | 1.14 (0.90-1.43) | 0.284 |
| T1_CVAI ≥93.32 & T2_hs-CRP <1 | 1.61 (1.21-2.13) | 0.001 |  | 1.36 (1.02-1.82) | 0.036 |  | 1.36 (1.02-1.81) | 0.039 |
| T1_CVAI ≥93.32 & T2_hs-CRP ≥1 | 1.62 (1.31-2.00) | < 0.001 |  | 1.42 (1.14-1.77) | 0.002 |  | 1.38 (1.11-1.72) | 0.004 |
| **Stroke** |  |  |  |  |  |  |  |  |
| T1_CVAI <93.32 & T2_hs-CRP <1 | Reference |  |  | Reference |  |  | Reference |  |
| T1_CVAI <93.32 & T2_hs-CRP ≥1 | 1.20 (0.87-1.64) | 0.263 |  | 1.16 (0.85-1.59) | 0.355 |  | 1.15 (0.84-1.57) | 0.401 |
| T1_CVAI ≥93.32 & T2_hs-CRP <1 | 2.11 (1.49-2.99) | < 0.001 |  | 1.75 (1.23-2.49) | 0.002 |  | 1.68 (1.18-2.39) | 0.004 |
| T1_CVAI ≥93.32 & T2_hs-CRP ≥1 | 2.31 (1.77-3.03) | < 0.001 |  | 1.83 (1.38-2.43) | < 0.001 |  | 1.72 (1.30-2.29) | < 0.001 |

Results are shown as hazard ratios (95% CI) derived from Cox regression models. Partially adjusted model adjusted for age, sex, smoking, drinking, education, SBP, FPG, TC, LDL-C, Scr and UA. Fully adjusted model further included history of cardiometabolic disease (for the other disease analyses), including hypertension, diabetes, heart disease and stroke.

Table S19 Interactive effects of CVAI and hs-CRP on the risk of cardiometabolic diseases

| **Interactive items** | **Crude model** | |  | **Fully adjusted model** | |
| --- | --- | --- | --- | --- | --- |
| **Coefficients**  **(95% CI)** | ***P*-value** |  | **Coefficients**  **(95% CI)** | ***P*-value** |
| **Hypertension** |  |  |  |  |  |
| Additive effect |  |  |  |  |  |
| RERI | 0.40 (0.01-0.78) | 0.042 |  | 0.29 (-0.04-0.61) | 0.086 |
| AP | 0.18 (0.02-0.35) | 0.032 |  | 0.18 (-0.02-0.37) | 0.075 |
| SI | 1.52 (0.95-2.42) | 0.078 |  | 1.84 (0.74-4.57) | 0.191 |
| Multiplicative effect | 1.17 (0.95-1.45) | 0.144 |  | 1.17 (0.94-1.45) | 0.159 |
| **Diabetes** |  |  |  |  |  |
| Additive effect |  |  |  |  |  |
| RERI | 0.54 (0.06-1.03) | 0.027 |  | 0.29 (-0.15-0.74) | 0.191 |
| AP | 0.20 (0.03-0.38) | 0.022 |  | 0.14 (-0.06-0.34) | 0.184 |
| SI | 1.48 (0.98-2.22) | 0.062 |  | 1.34 (0.81-2.19) | 0.253 |
| Multiplicative effect | 1.15 (0.86-1.53) | 0.342 |  | 1.08 (0.81-1.44) | 0.607 |
| **Heart diseases** |  |  |  |  |  |
| Additive effect |  |  |  |  |  |
| RERI | 0.20 (-0.09-0.49) | 0.184 |  | 0.09 (-0.21-0.39) | 0.562 |
| AP | 0.11 (-0.05-0.28) | 0.177 |  | 0.06 (-0.14-0.26) | 0.561 |
| SI | 1.37 (0.80-2.34) | 0.248 |  | 1.22 (0.58-2.59) | 0.599 |
| Multiplicative effect | 1.07 (0.86-1.35) | 0.534 |  | 1.02 (0.81-1.28) | 0.854 |
| **Stroke** |  |  |  |  |  |
| Additive effect |  |  |  |  |  |
| RERI | 0.33 (-0.21-0.88) | 0.231 |  | 0.08 (-0.40-0.56) | 0.736 |
| AP | 0.12 (-0.07-0.31) | 0.226 |  | 0.04 (-0.19-0.26) | 0.736 |
| SI | 1.22 (0.85-1.74) | 0.274 |  | 1.08 (0.69-1.69) | 0.745 |
| Multiplicative effect | 0.90 (0.66-1.22) | 0.478 |  | 0.88 (0.65-1.19) | 0.397 |

Fully adjusted model including age, sex, smoking, drinking, education, SBP, FPG, TC, LDL-C, Scr, UA, history of cardiometabolic disease (for the other disease analyses) including hypertension, diabetes, heart disease and stroke. AP: attributable proportion due to interaction; RERI: relative excess risk due to interaction; SI: synergy index.


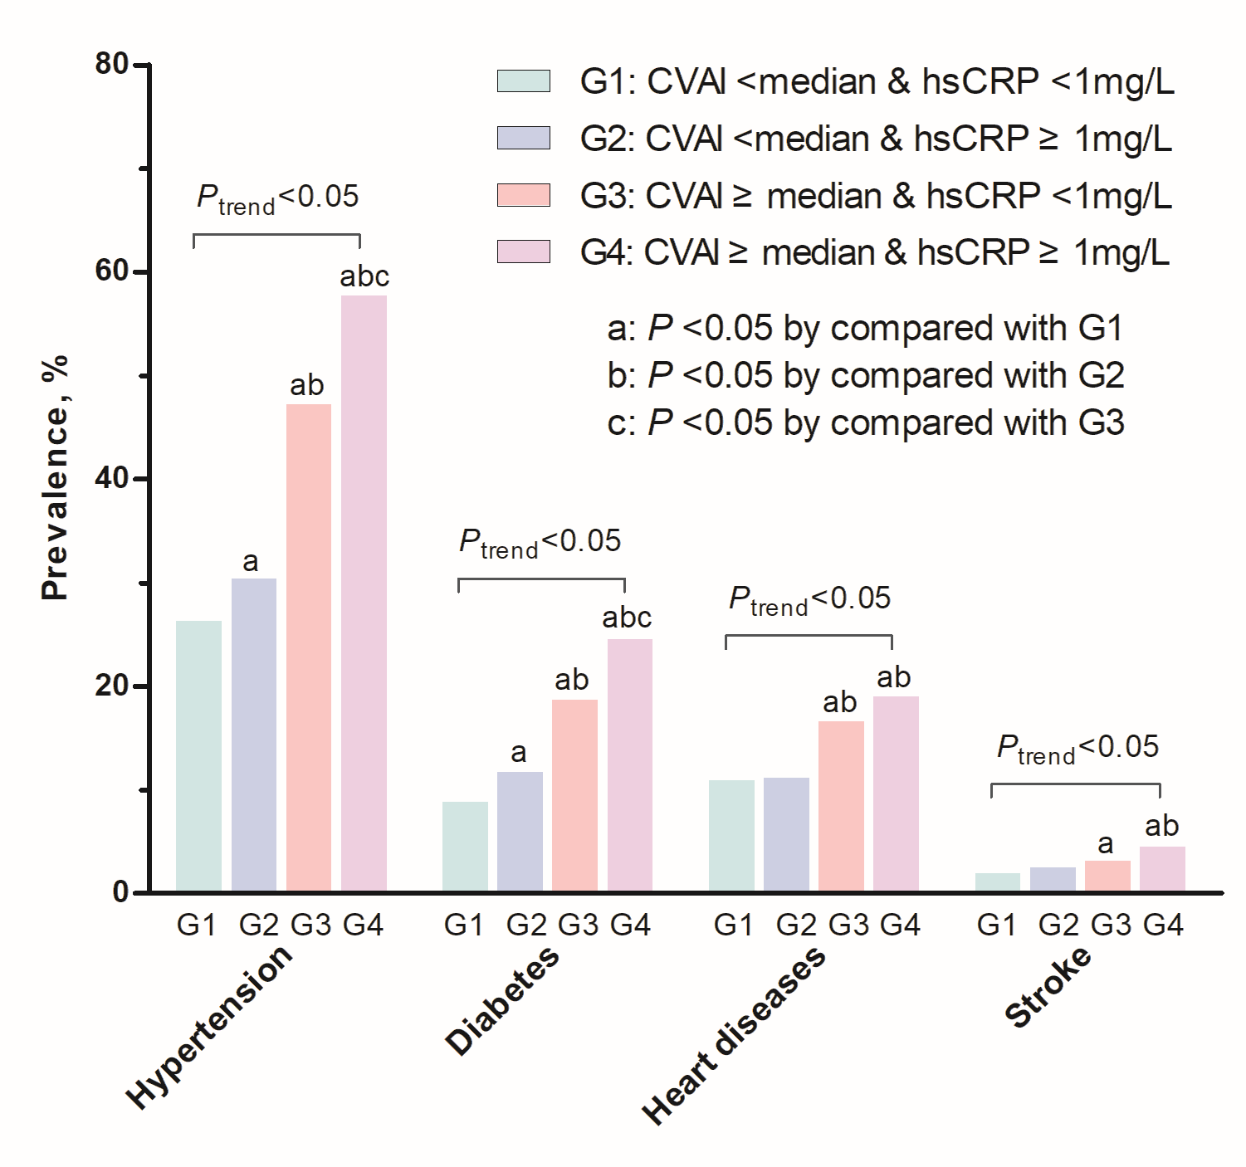


Figure S1 Prevalence of chronic diseases across groups. CVAI: Chinese visceral adiposity index; hs-CRP: high sensitivity C-reactive protein.
